# Supplementary material for: TCF21 and the environmental sensor aryl-hydrocarbon receptor cooperate to activate a pro-inflammatory gene expression program in coronary artery smooth muscle cells
Source: PubMed Central journal article supplement (PMC5439967; doi:10.1371/journal.pgen.1006750), 2017-05-08
Supplement: pgen.1006750.s014.pdf [file pgen.1006750.s014.pdf]

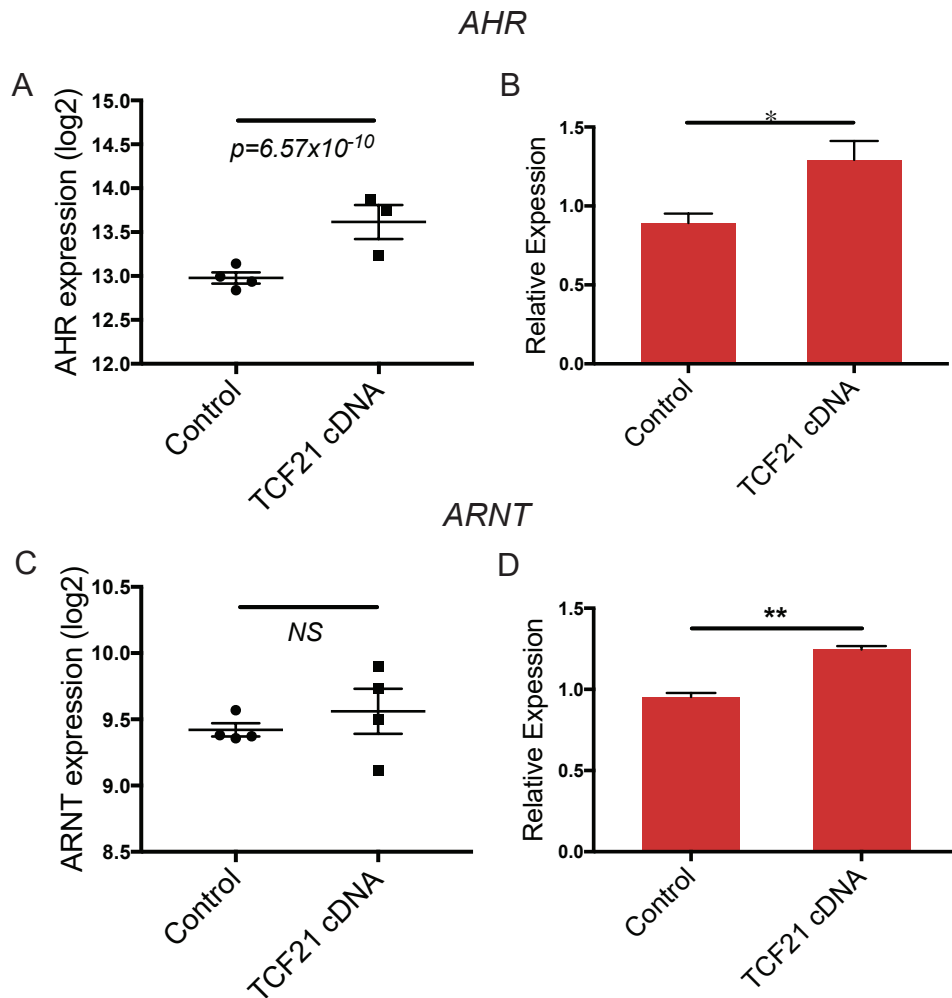

**Figure S5. AHR and ARNT are upregulated by TCF21 overexpression**

(A) RNA-Seq (FDR =  $6.57 \times 10^{-10}$ ), and (B) qPCR ( $0.89 \pm 0.06$  vs.  $1.29 \pm 0.12$ ,  $p=0.018$ ).

(C) ARNT is not significantly changed in TCF21 overexpression RNA-Seq, but (D) upregulation was confirmed with qPCR ( $0.95 \pm 0.02$  vs.  $1.25 \pm 0.02$ ,  $p=0.0008$ ).
