# Supplementary material for: TCF21 and the environmental sensor aryl-hydrocarbon receptor cooperate to activate a pro-inflammatory gene expression program in coronary artery smooth muscle cells
Source: PubMed Central journal article supplement (PMC5439967; doi:10.1371/journal.pgen.1006750), 2017-05-08
Supplement: pgen.1006750.s015.pdf [file pgen.1006750.s015.pdf]

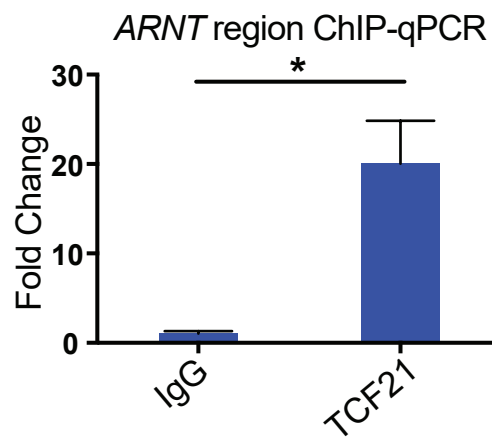

**Figure S6. TCF21 binds AHR dimerization partner ARNT gene upstream region in human coronary artery smooth muscle cells (HCASMC).** Binding of TCF21 to ARNT upstream region in HCASMC validated using ChIP-qPCR compared to IgG control.
