# Supplementary material for: TCF21 and the environmental sensor aryl-hydrocarbon receptor cooperate to activate a pro-inflammatory gene expression program in coronary artery smooth muscle cells
Source: PubMed Central journal article supplement (PMC5439967; doi:10.1371/journal.pgen.1006750), 2017-05-08
Supplement: pgen.1006750.s017.pdf [file pgen.1006750.s017.pdf]

Fig. S8

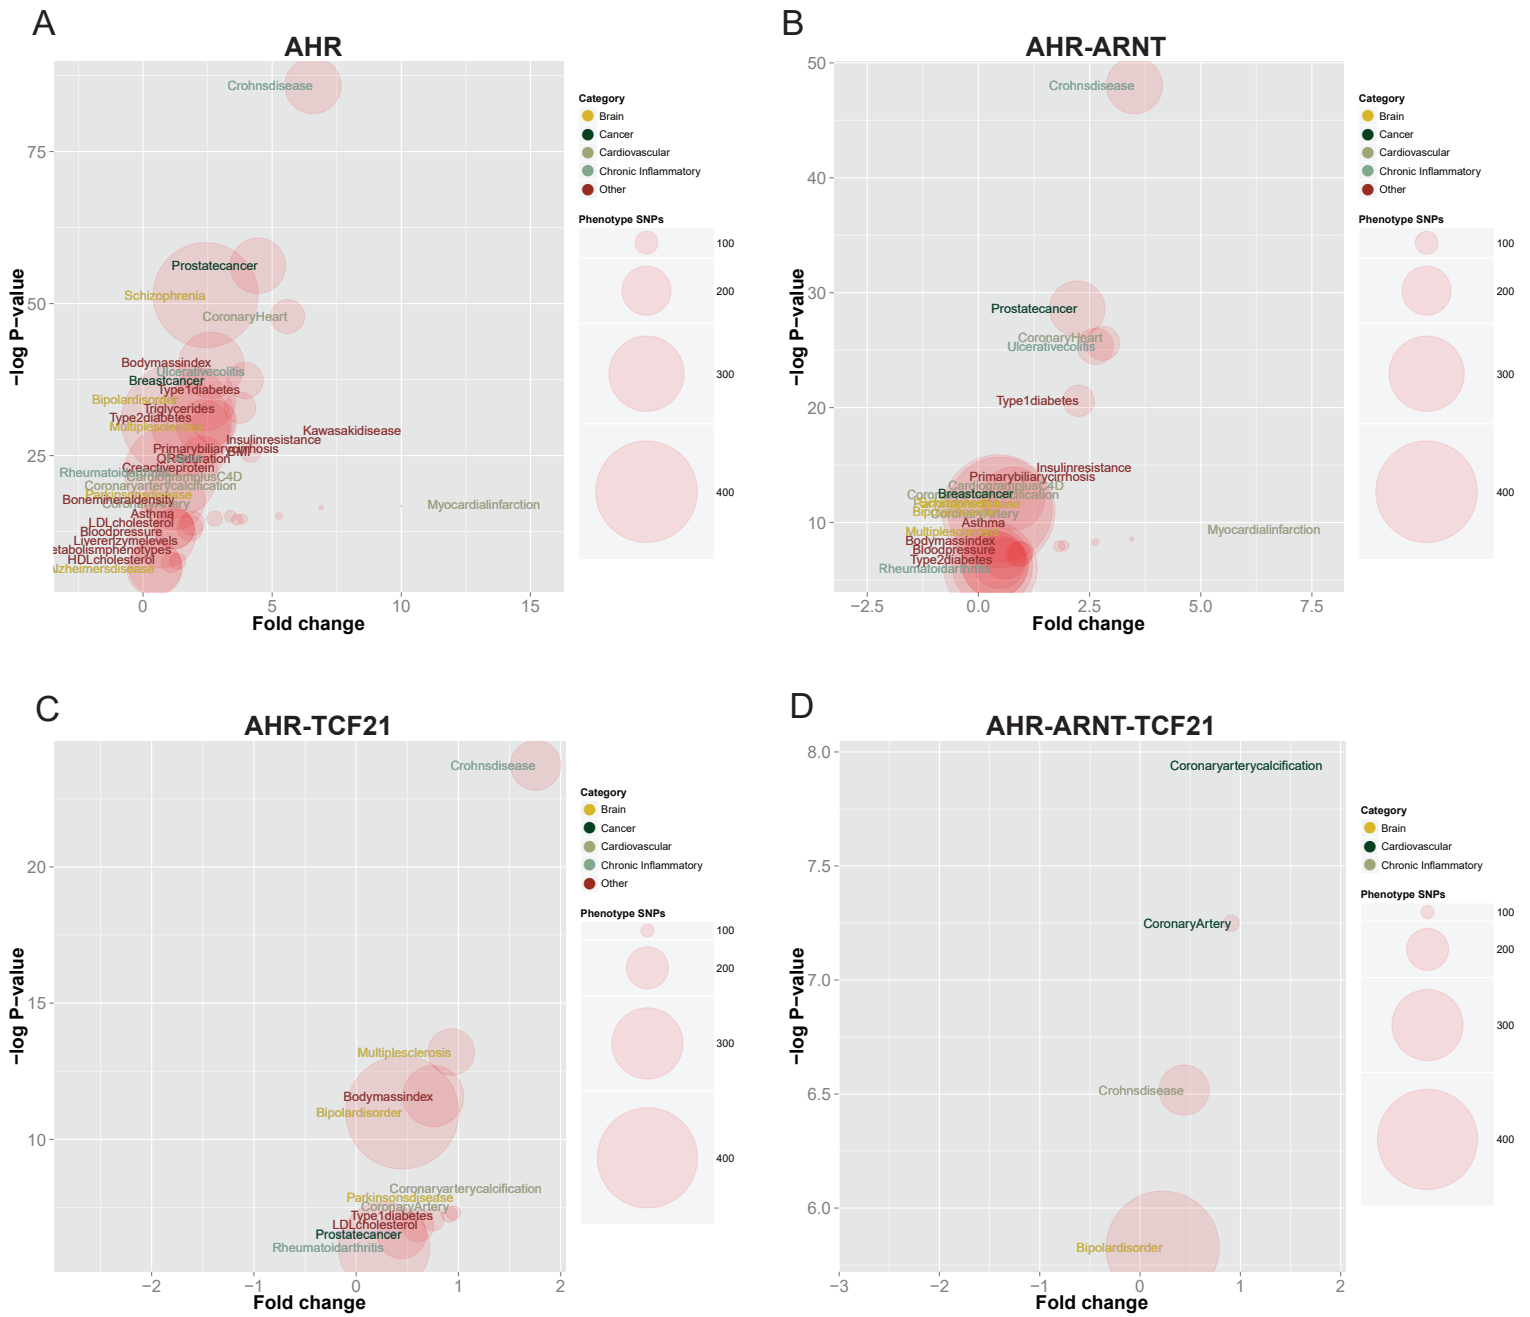

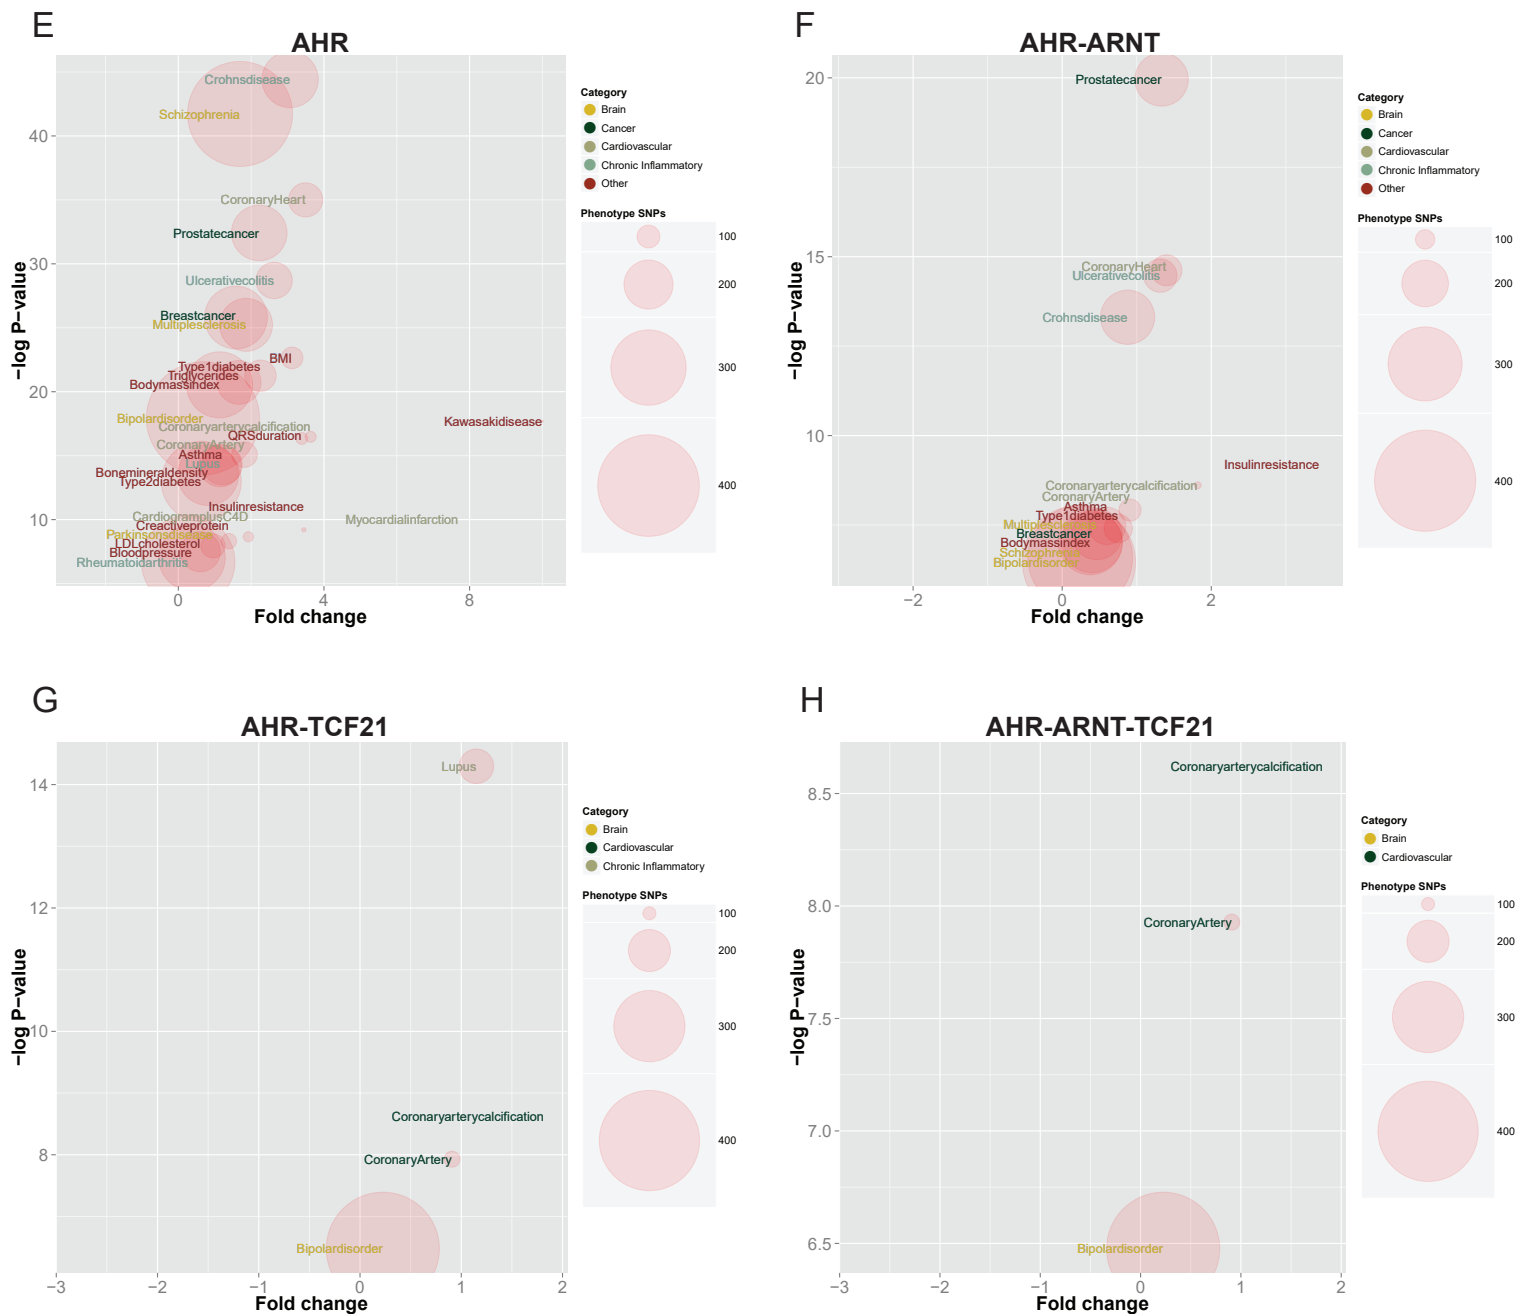

**Figure S8.**

**AHR-ARNT, AHR-TCF21 and AHR-ARNT-TCF21 overlapping ChIP-Seq sites enrich in coronary and inflammatory GWAS lead SNPs in window of +/-10kb and +/-5kb**

Overlap of (A) AHR ChIP-Seq binding sites, (B) AHR and ARNT ChIP-Seq binding sites, (C) AHR-TCF21 ChIP-Seq binding sites and (D) AHR-ARNT-TCF21 ChIP-Seq sites with GWAS SNPs in a window of +/-10000bp tested for significance using binomial test. Overlap of (E) AHR ChIP-Seq binding sites, (F) AHR and ARNT ChIP-Seq binding sites, (G) AHR-TCF21 ChIP-Seq binding sites and (H) AHR-ARNT-TCF21 ChIP-Seq sites with GWAS SNPs in a window of +/-5000bp tested for significance using binomial test.
