# Supplementary material for: TCF21 and the environmental sensor aryl-hydrocarbon receptor cooperate to activate a pro-inflammatory gene expression program in coronary artery smooth muscle cells
Source: PubMed Central journal article supplement (PMC5439967; doi:10.1371/journal.pgen.1006750), 2017-05-08
Supplement: pgen.1006750.s018.pdf [file pgen.1006750.s018.pdf]

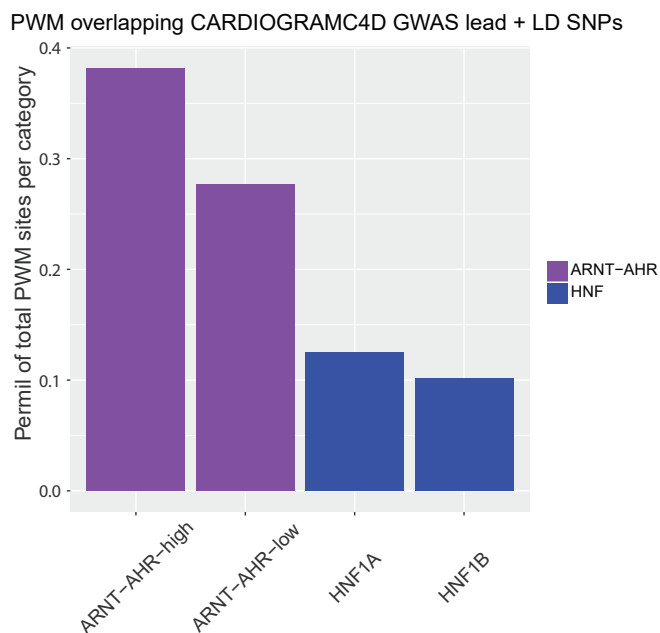

**Figure S9. Enrichment of AHR-ARNT PWM to SNPs in LD with CARDIOGRAM+C4D GWAS lead SNPs.**

Compared to control PWM, HNF1A and HNF1B, significantly higher proportion of PWM binding sites for AHR-ARNT co-localized to CARDIOGRAM+C4D GWAS lead SNPs plus SNPs in LD defined with  $r^2 > 0.8$  (statistical test, Z score=3.04,  $p < 0.005$ ).

Similar trend was observed for both, low and high stringency cut-offs for ARNT-AHR PWM matrix. In total, 456 ARNT-AHR sites overlap CARDIOGRAM SNPs (lead plus LD  $D' > 0.8$ ).
