# Supplementary material for: TCF21 and the environmental sensor aryl-hydrocarbon receptor cooperate to activate a pro-inflammatory gene expression program in coronary artery smooth muscle cells
Source: PubMed Central journal article supplement (PMC5439967; doi:10.1371/journal.pgen.1006750), 2017-05-08
Supplement: pgen.1006750.s019.pdf [file pgen.1006750.s019.pdf]

**Fig. S10**

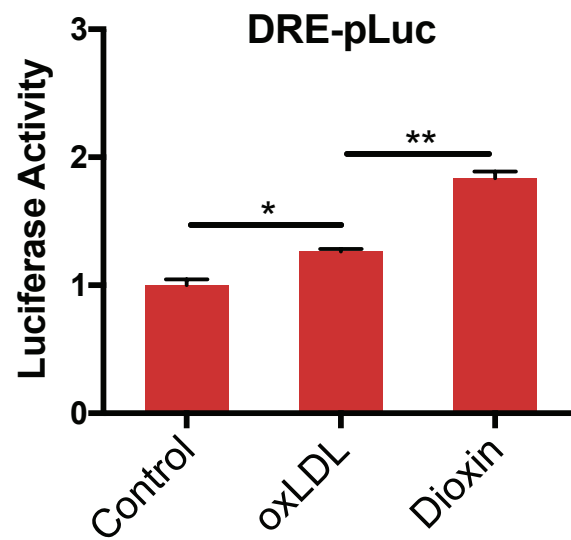

**Figure S10. Oxidized LDL is an agonist of the AHR pathway**

Luciferase reporter assay with dioxin response element (DRE) and minimal promoter driving the expression of the luciferase gene (pLuc). Both treatment with oxLDL ( $1.0 \pm 0.05$  vs.  $1.26 \pm 0.02$ ;  $p=0.01$ ) and Dioxin ( $1.0 \pm 0.05$  vs.  $1.84 \pm 0.05$ ;  $p<0.001$ ) showed significant increase in luciferase activity compared to control.
