# Supplementary material for: TCF21 and the environmental sensor aryl-hydrocarbon receptor cooperate to activate a pro-inflammatory gene expression program in coronary artery smooth muscle cells
Source: PubMed Central journal article supplement (PMC5439967; doi:10.1371/journal.pgen.1006750), 2017-05-08
Supplement: pgen.1006750.s020.pdf [file pgen.1006750.s020.pdf]

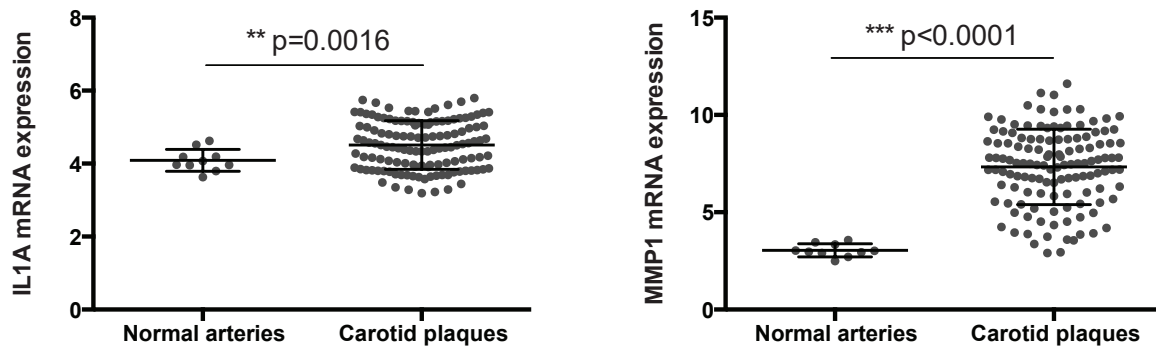

**Figure S11. Increased expression of IL1A and MMP1 in human carotid artery plaques**  
 BIKE biorepository data showing increased expression of *IL1A* and *MMP1* in human carotid artery plaques collected during endarterectomies compared to normal arteries (*IL1A*  $3.04 \pm 0.10$  vs.  $7.33 \pm 0.17$ ,  $p < 0.0001$ ; *MMP1*  $4.09 \pm 0.10$  vs.  $4.51 \pm 0.06$ ,  $p = 0.0016$ ). (\*\*  $p < 0.005$ , \*\*\*  $p < 0.0005$ )
