# Supplementary material for: TCF21 and the environmental sensor aryl-hydrocarbon receptor cooperate to activate a pro-inflammatory gene expression program in coronary artery smooth muscle cells
Source: PubMed Central journal article supplement (PMC5439967; doi:10.1371/journal.pgen.1006750), 2017-05-08
Supplement: pgen.1006750.s022.pdf [file pgen.1006750.s022.pdf]

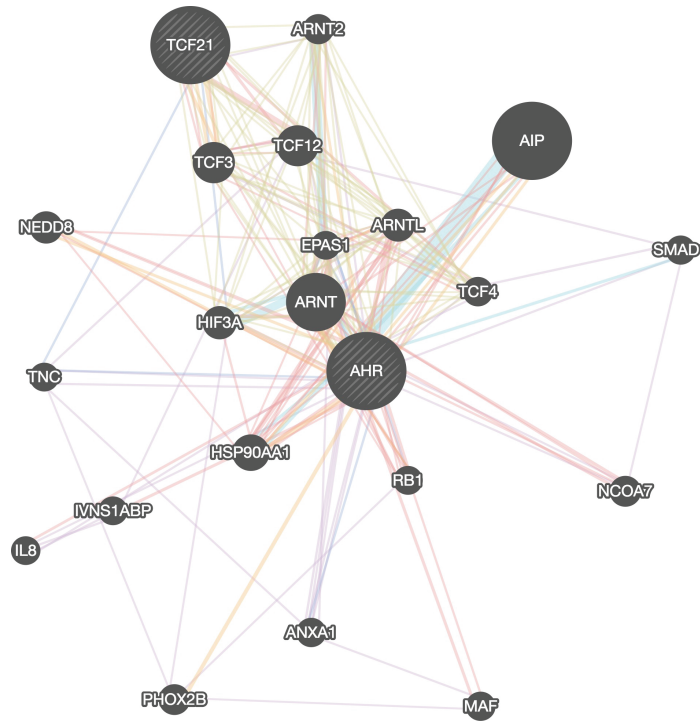

**Figure S13. Network of interactions of TCF21 and AHR genes**  
 Network was generated using Genemania tool and shows 231 total links based on protein-protein interactions, co-expression, predicted interactions, pathway analysis, co-localization, genetic interactions and shared protein domains. TCF21 and AHR are connected in protein-protein interaction network through TCF4, TCF3, TCF12 and RB1.
